# Supplementary material for: SVM-based prediction of linear B-cell epitopes using Bayes Feature Extraction
Source: PubMed Central journal article supplement (PMC3005920; doi:10.1186/1471-2164-11-s4-s21), 2010-12-02
Supplement: 1471-2164-11-S4-S21-S1.pdf [file 1471-2164-11-S4-S21-S1.pdf]

**Average  $P_x$  of amino acids:** Average  $P_x$  of each amino acid is calculated by averaging the  $P_x$  values of the particular amino acid across all residue positions on the 20-mer peptides from analysis and control subsets of EL-Manzalawy and Chen datasets.

| <b>Average <math>P_x</math></b> |                     |                |                 |                |
|---------------------------------|---------------------|----------------|-----------------|----------------|
| <b>Amino acid</b>               | <b>EL-Manzalawy</b> |                | <b>Chen</b>     |                |
|                                 | <b>Analysis</b>     | <b>Control</b> | <b>Analysis</b> | <b>Control</b> |
| A                               | 0.95                | 1.07           | 0.92            | 0.93           |
| C                               | 0.87                | 1.11           | 1.13            | 1.39           |
| D                               | 1.04                | 1.07           | 1.03            | 1.07           |
| E                               | 1.07                | 0.99           | 1.00            | 1.00           |
| F                               | 0.77                | 1.02           | 0.77            | 1.11           |
| G                               | 1.21                | 1.05           | 1.21            | 0.99           |
| H                               | 1.14                | 1.19           | 1.11            | 1.26           |
| I                               | 0.95                | 1.12           | 0.85            | 1.00           |
| K                               | 1.01                | 1.13           | 0.96            | 0.92           |
| L                               | 0.80                | 1.08           | 0.77            | 1.02           |
| M                               | 0.93                | 1.20           | 1.10            | 1.25           |
| N                               | 1.24                | 0.98           | 1.22            | 1.10           |
| P                               | 1.60                | 1.10           | 1.57            | 1.08           |
| Q                               | 1.27                | 1.04           | 1.27            | 1.10           |
| R                               | 0.93                | 0.96           | 1.03            | 0.99           |
| S                               | 1.13                | 1.08           | 1.05            | 1.13           |
| T                               | 1.25                | 1.08           | 1.35            | 1.27           |
| V                               | 0.96                | 0.98           | 0.99            | 1.03           |
| W                               | 2.16                | 1.38           | 1.50            | 1.15           |
| Y                               | 1.09                | 0.99           | 1.01            | 1.06           |
