# Supplementary material for: SVM-based prediction of linear B-cell epitopes using Bayes Feature Extraction
Source: PubMed Central journal article supplement (PMC3005920; doi:10.1186/1471-2164-11-s4-s21), 2010-12-02
Supplement: 1471-2164-11-S4-S21-S2.pdf [file 1471-2164-11-S4-S21-S2.pdf]

**SVM parameter optimization:** Training sets from EL-Manzalawy and Chen datasets were trained under 10-fold cross-validation using various C and  $\gamma$  values. Optimal set of C and  $\gamma$  values for each peptide representation is indicated below the plot.

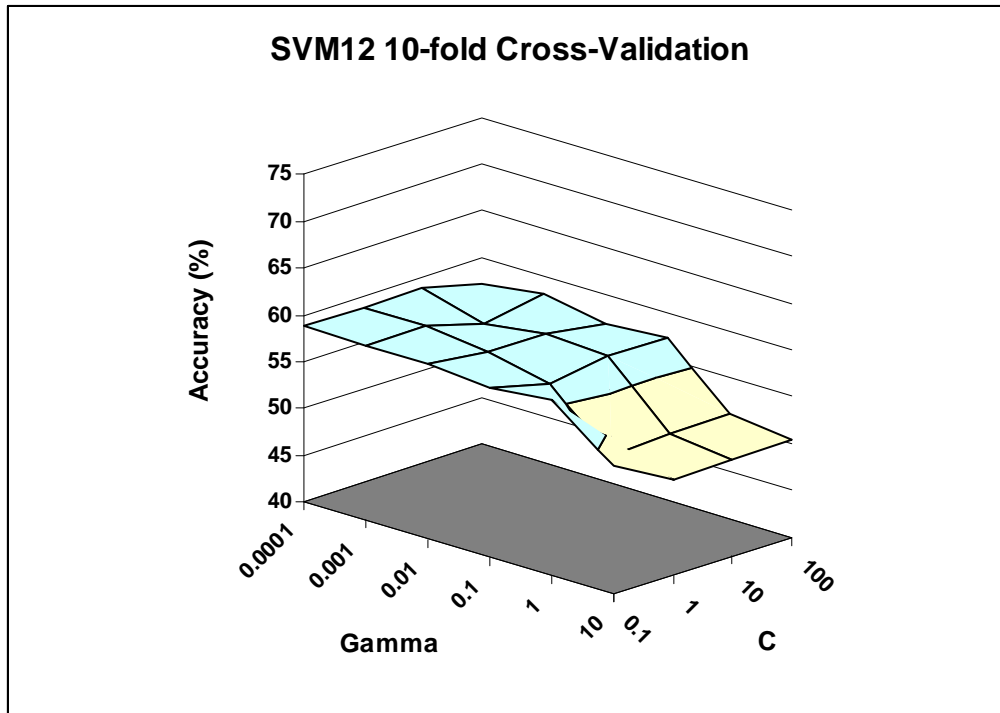

C=0.1 and  $\gamma$  =0.0001

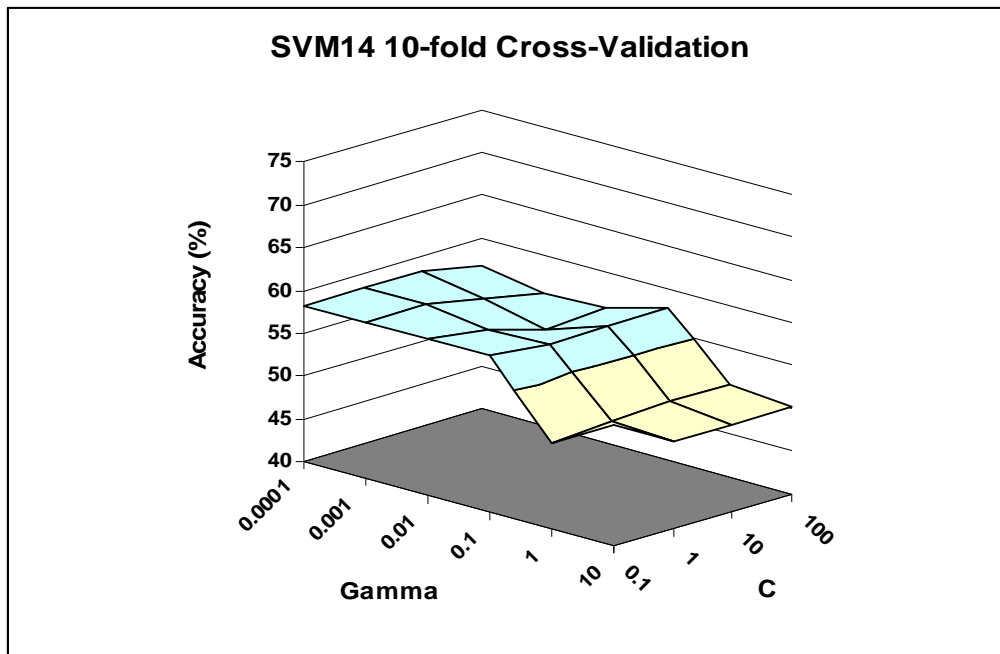

C=0.1 and  $\gamma$  =0.0001

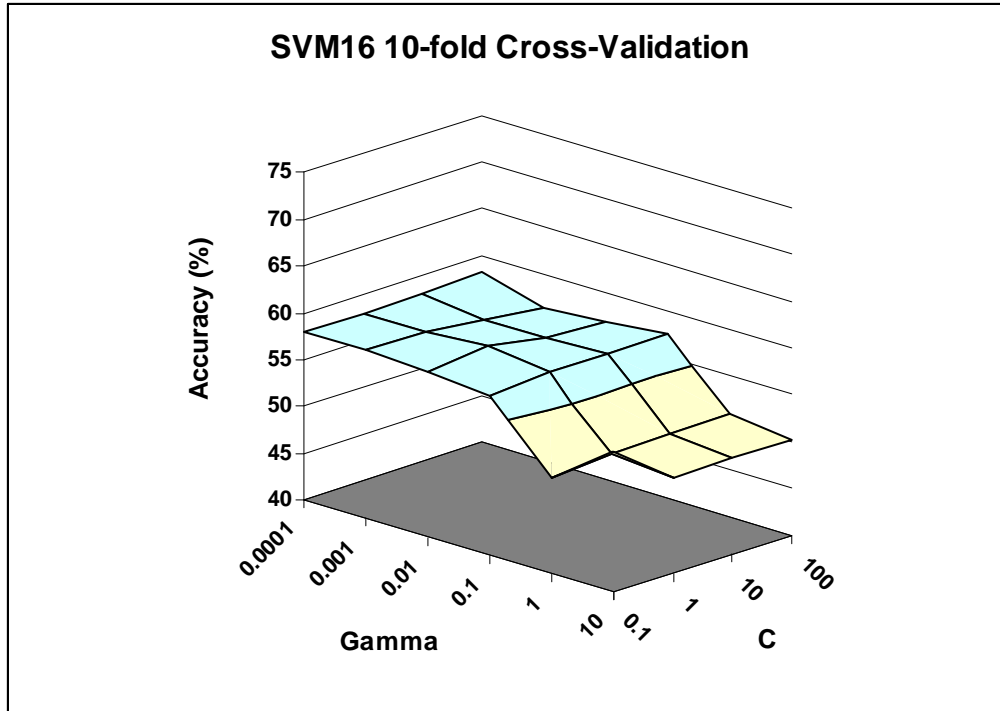

C=1 and  $\gamma=0.01$

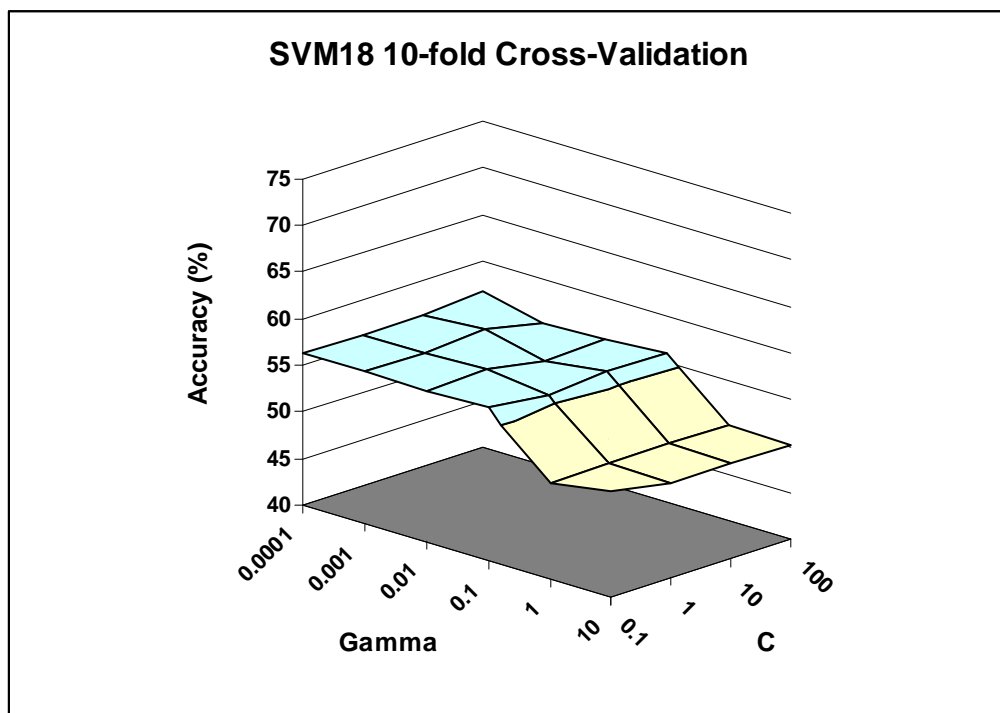

C=10 and  $\gamma=0.001$

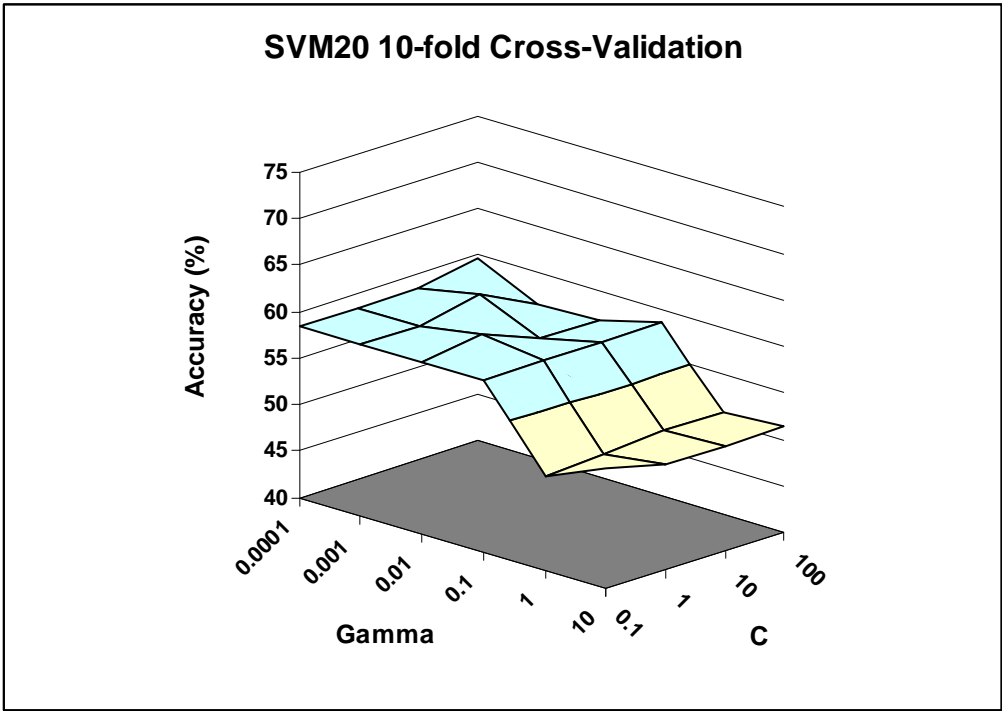

C=10 and  $\gamma=0.001$

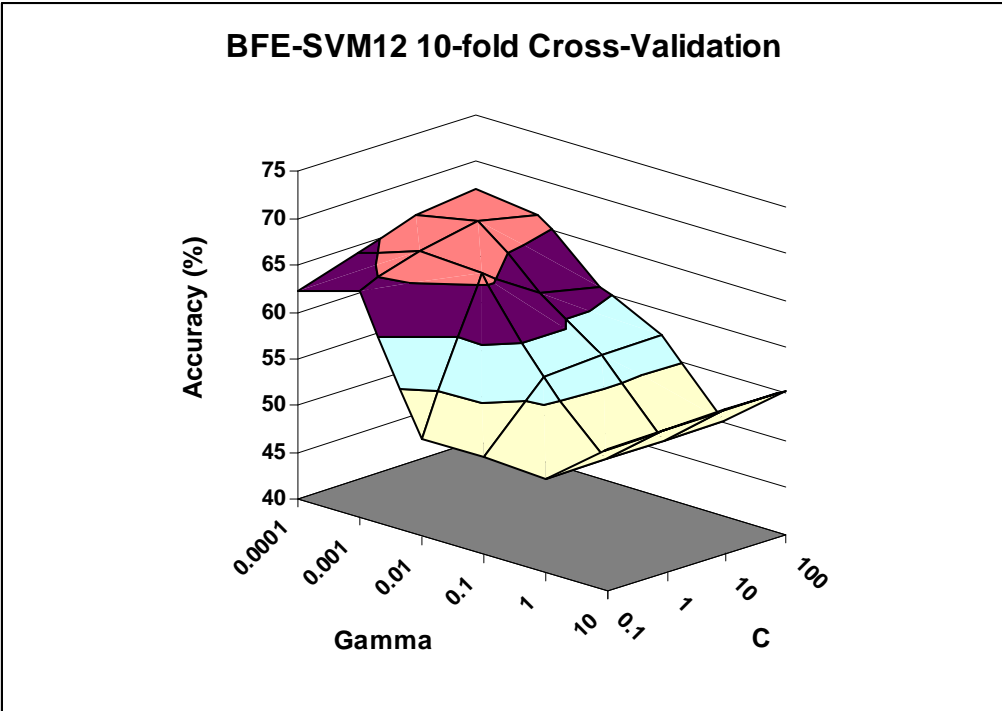

C=100 and  $\gamma=0.0001$

### BFESVM14 10-fold Cross-Validation

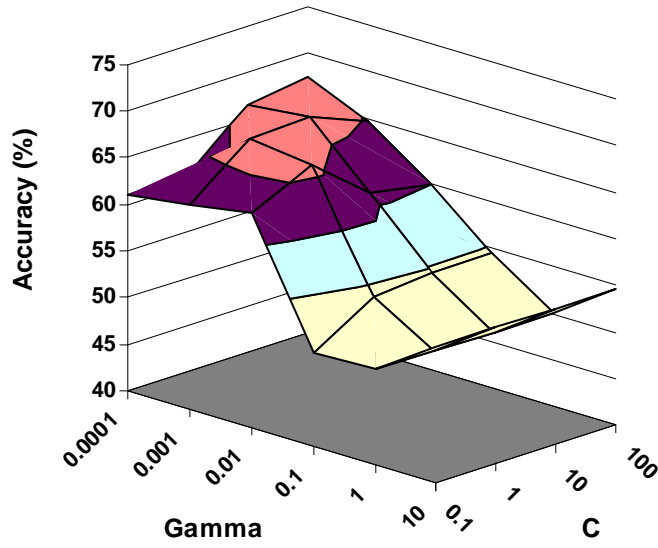

C=100 and  $\gamma=0.0001$

### BFESVM16 10-fold Cross-Validation

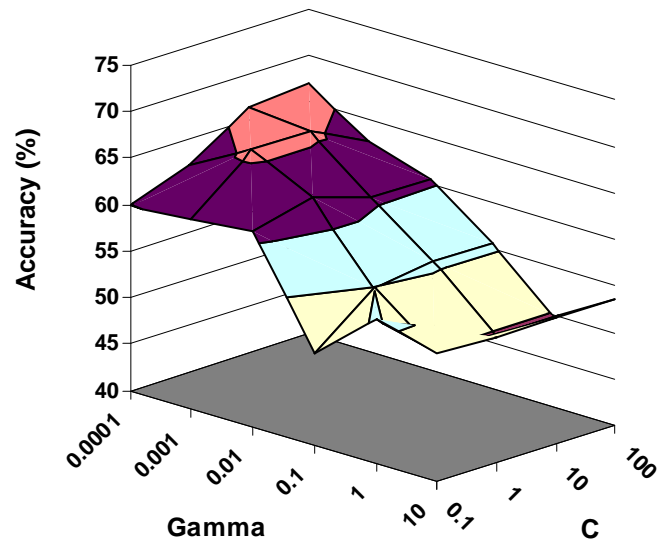

C=100 and  $\gamma=0.0001$

### BFESVM18 10-fold Cross-Validation

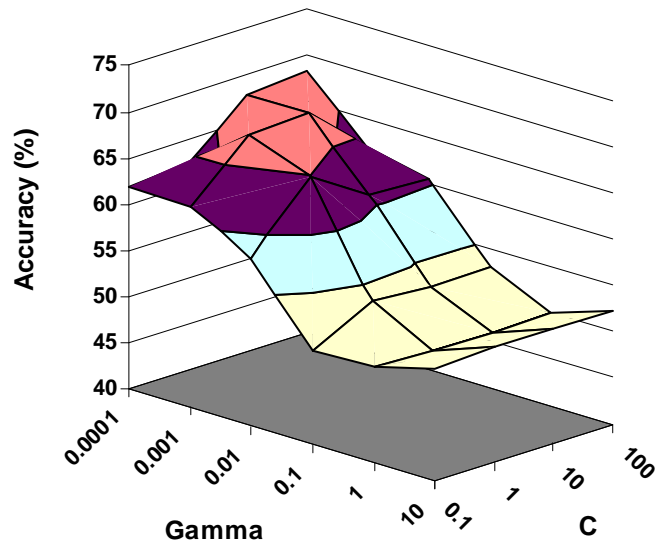

C=100 and  $\gamma = 0.0001$

### BFESVM20 10-fold Cross-Validation

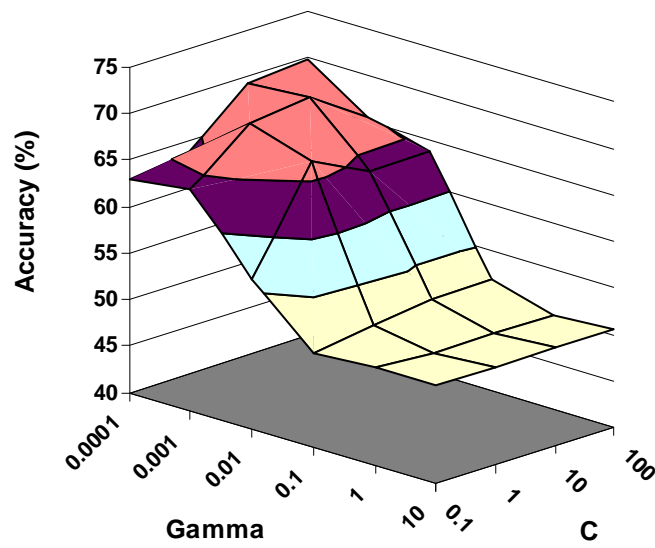

C=100 and  $\gamma = 0.0001$

### BFE-Chen 10-fold Cross-Validation

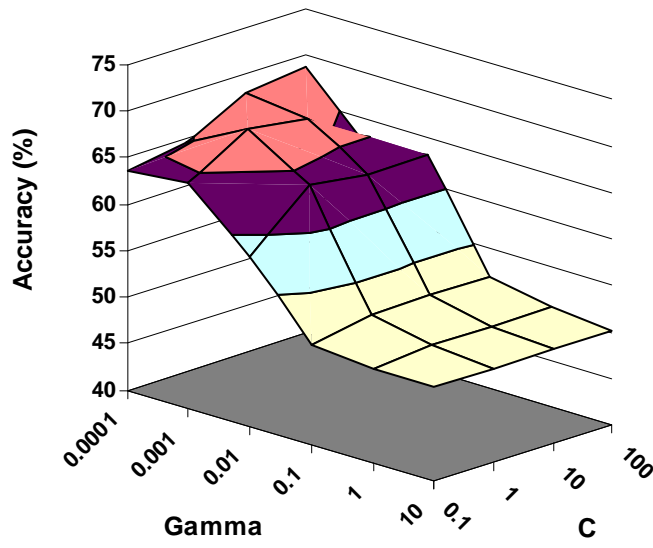

C=100 and  $\gamma = 0.0001$
